# Supplementary material for: Walking with added mass magnifies salient features of human foot energetics
Source: Oxford University Press journal article supplement (doi:10.1242/jeb.207472), 2020-06-15
Supplement: jeb207472supp.pdf [file jeb207472supp.pdf]

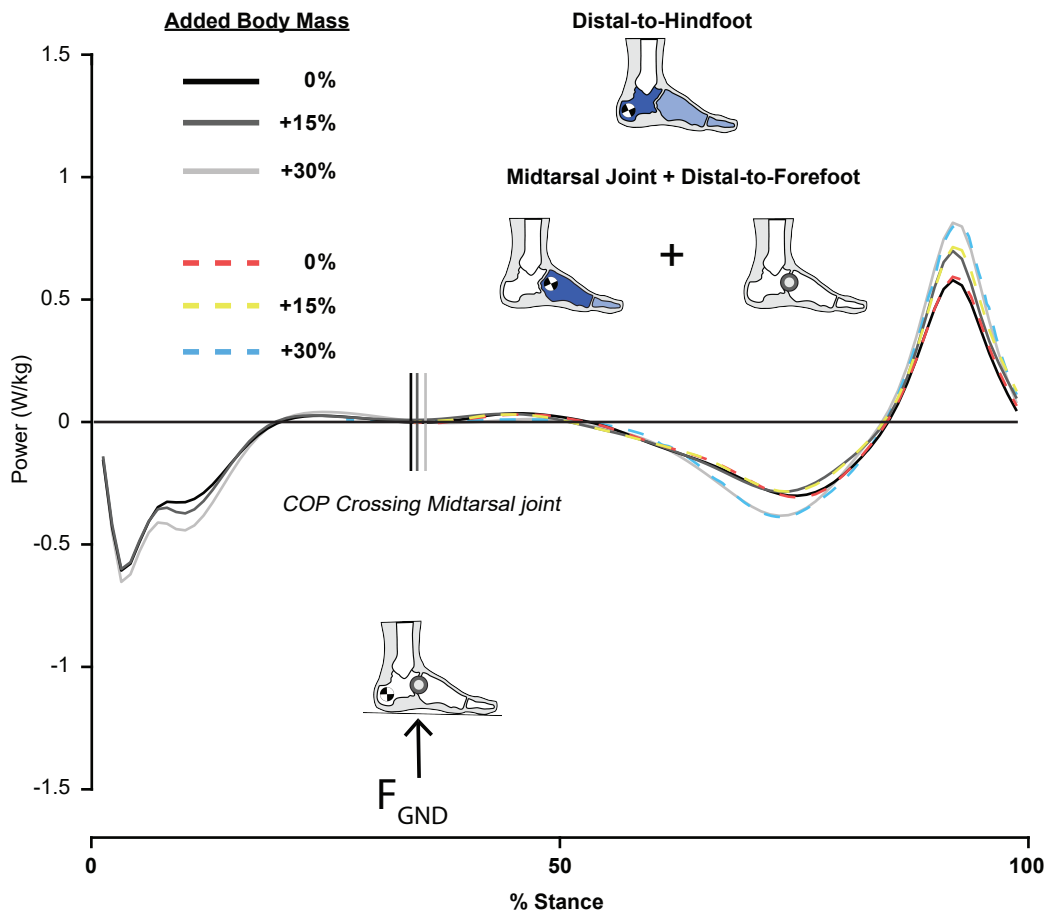

**Fig. S1.** Mechanical power (N=21) from subareas of the foot: distal-to-hindfoot (solid lines) and summedmidtarsal joint and distal-to-forefoot (dashed lines). After the center-of-pressure (COP) moves anterior to themidtarsal joint (denoted by the vertical lines), the magnitude of distal-to-hindfoot power is similar to the summation ofmidtarsal joint and distal-to-forefoot powers.

**Table S1:** Distal-to-Hindfoot Work during Stance

|                          |               | Un-normalized<br>(J)            | Body Mass<br>(J/kg)               | Body Mass +<br>Added Mass<br>(J/kg) |
|--------------------------|---------------|---------------------------------|-----------------------------------|-------------------------------------|
|                          | Added<br>Mass |                                 | mean ± std.d                      |                                     |
| <b>Negative<br/>Work</b> | <b>%0</b>     | -8.0549 ± 3.5831 <sup>*</sup>   | -0.0982 ± 0.0354 <sup>**</sup>    | -0.0982 ± 0.0355                    |
|                          | <b>%15</b>    | -8.1254 ± 3.8319 <sup>+</sup>   | -0.0972 ± 0.0310 <sup>++</sup>    | -0.0865 ± 0.0273                    |
|                          | <b>%30</b>    | -9.2261 ± 4.2079 <sup>*,+</sup> | -0.1122 ± 0.0379 <sup>**,++</sup> | -0.0885 ± 0.0299                    |
| <b>Positive<br/>Work</b> | <b>%0</b>     | 4.6847 ± 2.2115 <sup>¥,  </sup> | 0.0557 ± 0.0228 <sup>¥¥</sup>     | 0.0557 ± 0.0228                     |
|                          | <b>%15</b>    | 5.3558 ± 2.2739 <sup>¥</sup>    | 0.0641 ± 0.0237                   | 0.0571 ± 0.0213                     |
|                          | <b>%30</b>    | 5.7480 ± 2.6823 <sup>  </sup>   | 0.0682 ± 0.0260 <sup>¥¥</sup>     | 0.0538 ± 0.0204                     |
| <b>Net<br/>Work</b>      | <b>%0</b>     | -3.3702 ± 3.9143                | -0.0425 ± 0.0453                  | -0.0425 ± 0.0453                    |
|                          | <b>%15</b>    | -2.7696 ± 4.2325                | -0.0331 ± 0.0457                  | -0.0294 ± 0.0406                    |
|                          | <b>%30</b>    | -3.4780 ± 4.6964                | -0.0439 ± 0.0498                  | -0.0347 ± 0.0392                    |

\* p = 0.029 || <sup>+</sup>p = 0.013 || \*\* p = 0.023 || <sup>++</sup>p = 0.027 || <sup>¥</sup>p = 0.032 || <sup>||</sup>p < 0.001 || <sup>¥¥</sup>p < 0.001

**Table S2:** Distal-to-Hindfoot Work when COP was posterior to midtarsal joint

|                          |               | Un-normalized<br>(J)         | Body Mass<br>(J/kg)          | Body Mass + Added<br>Mass<br>(J/kg) |
|--------------------------|---------------|------------------------------|------------------------------|-------------------------------------|
|                          | Added<br>Mass | mean ± std.d                 |                              |                                     |
| <b>Negative<br/>Work</b> | <b>%0</b>     | -3.2841±0.9121 <sup>*</sup>  | -0.0400±0.0079 <sup>+</sup>  | -0.0400±0.0079                      |
|                          | <b>%15</b>    | -3.4870±0.8901               | -0.0424±0.0089               | -0.0378±0.0081                      |
|                          | <b>%30</b>    | -3.8335±0.7988 <sup>*</sup>  | -0.0473±0.0106 <sup>+</sup>  | -0.0378±0.0086                      |
| <b>Positive<br/>Work</b> | <b>%0</b>     | 0.2957±0.2264                | 0.0036±0.0028                | 0.0036±0.0028                       |
|                          | <b>%15</b>    | 0.3398±0.3470                | 0.0041±0.0040                | 0.0036±0.0035                       |
|                          | <b>%30</b>    | 0.3571±0.3288                | 0.0043±0.0036                | 0.0034±0.0029                       |
| <b>Net<br/>Work</b>      | <b>%0</b>     | -2.9884±0.9121 <sup>**</sup> | -0.0363±0.0082 <sup>++</sup> | -0.0363±0.0082                      |
|                          | <b>%15</b>    | -3.1472±0.8668               | -0.0384±0.0093               | -0.0342±0.0085                      |
|                          | <b>%30</b>    | -3.4763±0.7583 <sup>**</sup> | -0.0431±0.0106 <sup>++</sup> | -0.0340±0.0085                      |

\* p = 0.006 || <sup>+</sup>p = 0.013 || <sup>\*\*</sup>p = 0.011 || <sup>++</sup>p = 0.021

**Table S3:** Distal-to-Hindfoot Work when COP was anterior to midtarsal joint

|                          |               | Un-normalized<br>(J)         | Body Mass<br>(J/kg)         | Body Mass + Added<br>Mass<br>(J/kg) |
|--------------------------|---------------|------------------------------|-----------------------------|-------------------------------------|
|                          | Added<br>Mass | mean ± std.d                 |                             |                                     |
| <b>Negative<br/>Work</b> | <b>%0</b>     | -4.7708±3.4361               | -0.0582±0.0354              | -0.0582±0.0354                      |
|                          | <b>%15</b>    | -4.6389±3.4015               | -0.0548±0.0300              | -0.0487±0.0264                      |
|                          | <b>%30</b>    | -5.3926±3.9707               | -0.0648±0.0367              | -0.0512±0.0288                      |
| <b>Positive<br/>Work</b> | <b>%0</b>     | 4.3890±2.1484 <sup>*,+</sup> | 0.0520±0.0221 <sup>**</sup> | 0.0520±0.0221                       |
|                          | <b>%15</b>    | 5.0159±2.1225 <sup>*</sup>   | 0.0600±0.0219               | 0.0535±0.0197                       |
|                          | <b>%30</b>    | 5.3909±2.5230 <sup>+</sup>   | 0.0640±0.0242 <sup>**</sup> | 0.0504±0.1900                       |
| <b>Net<br/>Work</b>      | <b>%0</b>     | -0.3818±3.9544               | -0.0062±0.0447              | -0.0062±0.0447                      |
|                          | <b>%15</b>    | 0.3770±4.0165                | 0.0052±0.0438               | 0.0048±0.0390                       |
|                          | <b>%30</b>    | -0.0017±4.7473               | -0.0009±0.0493              | -0.0007±0.0387                      |

\* p = 0.040 || <sup>+</sup>p < 0.001 || <sup>\*\*</sup>p < 0.001

**Table S4:** Midtarsal 6DOF Joint Work during Stance

|                          |               | Un-normalized<br>(J)          | Body Mass<br>(J/kg)            | Body Mass + Added<br>Mass<br>(J/kg) |
|--------------------------|---------------|-------------------------------|--------------------------------|-------------------------------------|
|                          | Added<br>Mass | mean ± std.d                  |                                |                                     |
| <b>Negative<br/>Work</b> | <b>%0</b>     | -4.0015±3.2081                | -0.0478±0.0338                 | -0.0478±0.0338                      |
|                          | <b>%15</b>    | -3.8525±3.3856                | -0.0443±0.0290                 | -0.0393±0.0255                      |
|                          | <b>%30</b>    | -4.3935±3.4278                | -0.0523±0.0321                 | -0.0413±0.0253                      |
| <b>Positive<br/>Work</b> | <b>%0</b>     | 9.0485±3.7998 <sup>*,+</sup>  | 0.1078±0.0350 <sup>++,¥</sup>  | 0.1078±0.0350 <sup>¥¥</sup>         |
|                          | <b>%15</b>    | 9.8870±3.7135 <sup>**,*</sup> | 0.1183±0.0353 <sup>++,  </sup> | 0.1053±0.0314 <sup>   </sup>        |
|                          | <b>%30</b>    | 10.5160±3.8066 <sup>***</sup> | 0.1262±0.0385 <sup>¥,  </sup>  | 0.0995±0.0304 <sup>¥¥,   </sup>     |
| <b>Net<br/>Work</b>      | <b>%0</b>     | 5.0470±3.5946 <sup>•,♦</sup>  | 0.0600±0.0425 <sup>••</sup>    | 0.0600±0.0425                       |
|                          | <b>%15</b>    | 6.0345±3.5088 <sup>•</sup>    | 0.0740±0.0430                  | 0.0660±0.0384                       |
|                          | <b>%30</b>    | 6.1231±4.1247 <sup>♦</sup>    | 0.0739±0.0494 <sup>••</sup>    | 0.0582±0.03884                      |

\* p = 0.001 || +p < 0.001 || \*\*p = 0.039 || ++ p < 0.001 || ¥p < 0.001 || || p = 0.028 || ¥¥p = 0.029  
 || ||| p = 0.040 || • p = 0.041 || ♦ p = 0.028 || •• p = 0.025

**Table S5:** Distal-to-Forefoot Work during Stance

|                  |               | Un-normalized<br>(J) | Body Mass<br>(J/kg) | Body Mass + Added<br>Mass<br>(J/kg) |
|------------------|---------------|----------------------|---------------------|-------------------------------------|
|                  | Added<br>Mass |                      | mean ± std.d        |                                     |
|                  | %0            | -6.1855±3.1207       | -0.0755±0.0352      | -0.0755±0.0352                      |
| Negative<br>Work | %15           | -6.5815±2.9982*      | -0.0769±0.0297      | -0.0709±0.0263                      |
|                  | %30           | -7.1175±3.0964*      | -0.0864±0.0316      | -0.0682±0.0250                      |
|                  | %0            | 0.8085±0.5474**,+    | 0.0095±0.0057++,¥   | 0.0095±0.0057                       |
| Positive<br>Work | %15           | 0.9920±0.5826**      | 0.0117±0.0052++     | 0.0104±0.0046                       |
|                  | %30           | 1.1270±0.7161+       | 0.0129±0.0061¥      | 0.0102±0.0048                       |
|                  | %0            | -5.3765±3.3617       | -0.0660±0.0385      | -0.0660±0.0385                      |
| Net<br>Work      | %15           | -5.5895±3.1781       | -0.0680±0.0328      | -0.0605±0.0290                      |
|                  | %30           | -5.9905±3.1358       | -0.0735±0.0337      | -0.0580±0.0267                      |

\* p = 0.025 || +p = 0.009 || \*\*p = 0.013 || ++ p = 0.034 || ¥p = 0.006
